# Supplementary material for: COVID-19 in-vitro Diagnostics: State-of-the-Art and Challenges for Rapid, Scalable, and High-Accuracy Screening
Source: PubMed Central journal article supplement (PMC7902018; doi:10.3389/fbioe.2020.605702), 2021-01-28
Supplement: Table_1.pdf [file Table_1.pdf]

## In-Vitro Diagnostics for Rapid and High-Accuracy COVID-19 Screening.

**Table 1.** Diagnostic tests that received FDA EUA for emergency use in Clinical Laboratory Improvement Amendments (CLIA)-certified molecular diagnostics laboratories as of July 2020. **Approved (H):** FDA EUA, restricted to CLIA-certified molecular diagnostics laboratories to perform high complexity tests. **Approved (H, M):** FDA EUA, restricted to CLIA-certified molecular diagnostics laboratories to perform high and moderate complexity tests. **NP:** Nasopharyngeal, **OP:** Oropharyngeal, **AN:** Anterior nasal, **MT:** Mid-turbinate nasal, **BAL:** Bronchoalveolar lavage, **TA:** Tracheal Aspirate, **GC:** Genomic copies, **GE:** Genome equivalents, **PFU:** Plaque forming unit, **TCID<sub>50</sub>:** Tissue culture infectious dose, **PPA:** Positive Percent Agreement (Sensitivity), **NPA:** Negative Percent Agreement (Specificity). PPA and NPA were extracted from the Instructions for Use (IFU) manual of each diagnostic tool (FDA, 2020b). EUA status was updated using FINDdx (FINDdx, 2020).

| Manufacturer                                                                | Test name                                                                            | Sample                                                                  | Description                                                                                                                                                                                | Biomarkers                 | LOD/Sample Volume                                                       | PPA and NPA                                                                                    | EUA Status                                                                                                                            |
|-----------------------------------------------------------------------------|--------------------------------------------------------------------------------------|-------------------------------------------------------------------------|--------------------------------------------------------------------------------------------------------------------------------------------------------------------------------------------|----------------------------|-------------------------------------------------------------------------|------------------------------------------------------------------------------------------------|---------------------------------------------------------------------------------------------------------------------------------------|
| <b>RT-PCR for SARS-CoV-2 Detection</b>                                      |                                                                                      |                                                                         |                                                                                                                                                                                            |                            |                                                                         |                                                                                                |                                                                                                                                       |
| Sansure BioTech Inc.                                                        | Novel Coronavirus (2019-nCoV) Nucleic Acid Diagnostic Kit (PCR-Fluorescence Probing) | -NP, OP, AN and MT swabs                                                | -RT-PCR (PCR-Fluorescence Probing) for qualitative detection of the SARS-CoV-2 RNA                                                                                                         | ORF1ab and N genes         | 200 copies/mL                                                           | -PPA is 94.34% in 53 RT-PCR positive samples<br>-NPA is 98.96 % in 193 RT-PCR negative samples | - Approved (H)<br>- CE Marked<br>- Australian Therapeutic Goods Administration authorization<br>- Singapore Health Sciences Authority |
| Bio-Rad Laboratories, Inc                                                   | Bio-Rad SARS-CoV-2 ddPCR Test                                                        | -NP, AN and MT swabs<br>nasal and NP wash/aspirate                      | -Partition-based endpoint RT-PCR (RT-ddPCR: droplet digital PCR) test intended for the qualitative detection of SARS-CoV-2 RNA                                                             | N gene (N1 and N2 regions) | 625 copies/mL                                                           | -PPA: 94.87%<br>-NPA: 94.87%                                                                   | -Approved (H)<br>-CE marked approval<br>-RUO system and lab equipment                                                                 |
| BioFire Diagnostics, LLC                                                    | BioFire Respiratory Panel 2.1 (RP2.1)                                                | NP swabs                                                                | -Multiplexed PCR intended for the simultaneous qualitative detection and differentiation of SARS-CoV-2 RNA from multiple viral and bacterial respiratory organisms<br>-results in ~ 45 min | S and M genes              | 300 copies/mL                                                           | -PPA: 98%<br>-NPA: 100%                                                                        | Approved (H, M)                                                                                                                       |
| OPTI Medical Systems, Inc.                                                  | OPTI SARS-CoV-2 RT PCR Test                                                          | -Nasal, NP and OP swabs<br>-Sputum, TA, BAL, nasal and NP aspirate/wash | -RT-PCR test for the qualitative detection of SARS-CoV-2 RNA                                                                                                                               | N gene (N1 and N2 regions) | - 0.7 copies/μL in sputum samples<br>- 0.9 copies/μL in NP swab samples | 100%                                                                                           | - Approved (H)<br>- CE marked                                                                                                         |
| BioMérieux SA                                                               | SARS-COV-2 R-GENE®                                                                   | -NP, OP, AN and MT swabs<br>-Nasal aspirate/wash<br>-BAL                | -RT-PCR test for the qualitative detection of SARS-CoV-2 RNA                                                                                                                               | RdRp, E and N genes        | 380 GC/mL                                                               | 100%                                                                                           | Approved (H)                                                                                                                          |
| Fast Track Diagnostics Luxembourg S.á.r.l. (a Siemens Healthineers Company) | FTD SARS-CoV-2                                                                       | -Nasal, NP, OP swabs<br>- Nasal and NP wash/aspirate<br>-BAL            | -RT-PCR test for the qualitative detection of SARS-CoV-2 RNA                                                                                                                               | ORF1ab and N genes         | 0.0023 TCID <sub>50</sub> /mL                                           | 100%                                                                                           | - Approved (H)<br>- CE marked                                                                                                         |
| LabGenomics Co., Ltd.                                                       | LabGun™ COVID-19 RT-PCR Kit                                                          | -NP, OP, AN and MT swabs                                                | -RT-PCR test for the qualitative detection of SARS-CoV-2 RNA                                                                                                                               | RdRp and E gene            | 20 GC/μL                                                                | 100%                                                                                           | -Approved (H)<br>-CE marked                                                                                                           |

|                               |                                         |                                                                           |                                                                                                               |                                          |                                                                                                                                                                                                                                                                               |                                                                                                                |                                                                                                                                                                                                                              |
|-------------------------------|-----------------------------------------|---------------------------------------------------------------------------|---------------------------------------------------------------------------------------------------------------|------------------------------------------|-------------------------------------------------------------------------------------------------------------------------------------------------------------------------------------------------------------------------------------------------------------------------------|----------------------------------------------------------------------------------------------------------------|------------------------------------------------------------------------------------------------------------------------------------------------------------------------------------------------------------------------------|
|                               |                                         | -Nasal and NP wash/aspirate<br>-Sputum                                    |                                                                                                               |                                          |                                                                                                                                                                                                                                                                               |                                                                                                                | - Australian Therapeutics Administration authorization                                                                                                                                                                       |
| Rheonix, Inc.                 | Rheonix COVID-19™ MDx Assay             | -NP, OP, AN, MT and nasal swabs<br>-Nasal wash/aspirate<br>BAL            | -RT-PCR test for the qualitative detection of SARS-CoV-2 RNA                                                  | N gene (N1 region)                       | 625 GE/mL                                                                                                                                                                                                                                                                     | 100%                                                                                                           | Approved (H)                                                                                                                                                                                                                 |
| SEASUN BIOMATERIALS           | U-TOP™ COVID-19 Detection Kit           | -OP, NP, AN, MT and nasal swabs<br>-Nasal and NP wash/aspirate<br>-Sputum | -RT-PCR for qualitative detection of the SARS-CoV-2 RNA with 95% positivity rate                              | Two regions ORF1ab and one region N gene | 1 copy/μL                                                                                                                                                                                                                                                                     |                                                                                                                | - Approved (H)<br>- CE Marked<br>- Singapore Health Sciences Authority                                                                                                                                                       |
| SD Biosensor, Inc.            | STANDARD M nCoV Real-Time Detection kit | -NP, OP, nasal, MT and nasal swabs<br>-Sputum                             | -RT-PCR test for the qualitative detection of SARS-CoV-2 RNA<br>-Results in ~90 min                           | RdRp and E genes                         | - 0.25 copies/μL for upper respiratory specimens and 0.125 copies/μL for lower respiratory specimens on the CFX95 amplification system<br>-0.5 copies/μL for upper respiratory specimens and 0.25 copies/μL for lower respiratory specimens on the LC480 amplification system | -PPA is 100% in 30 samples<br>-NPA is 100% in 30 samples                                                       | - Approved (H)<br>- CE Marked<br>- Brazilian Health Regulatory Agency authorization<br>-Philippines FDA                                                                                                                      |
| Altona Diagnostics GmbH       | RealStar® SARS-CoV-2 RT-PCR Kit U.S     | -NP, OP, AN, MT and nasal swabs<br>-Nasal wash/aspirate                   | -RT-PCR test for the qualitative detection of SARS-CoV-2 RNA                                                  | E and S genes                            | - 625 copies/mL<br>-10 <sup>-1</sup> PFU/mL                                                                                                                                                                                                                                   | -PPA is 97.8%<br>-NPA is 97.3%                                                                                 | - Approved (H)<br>- CE marked                                                                                                                                                                                                |
| Seegene, Inc.                 | Allplex™ 2019-nCoV Assay                | -NP, OP, AN and MT swabs<br>-Sputum                                       | -RT-PCR test for the qualitative detection of SARS-CoV-2 RNA<br>-results in ~2 hours excluding RNA extraction | RdRp, N gene and E genes                 | -1250 copies/mL is using CFX96™ amplification system<br>-4167 copies/mL is using CFX96 Touch™ amplification system                                                                                                                                                            | - PPA is 100% in NP, OP and sputum samples<br>-NPA is 93.07% For NP and OP samples, and 100% in sputum samples | - Approved (H)<br>- CE Marked<br>- Australian Therapeutic Goods Administration authorization<br>- Singapore Health Sciences Authority<br>- Health Canada authorization<br>- Brazilian Health Regulatory Agency authorization |
| Trax Management Services Inc. | PhoenixDx® 2019-CoV                     | -Nasal, NP and OP swabs<br>-BAL                                           | -RT-PCR test for the qualitative detection of SARS-CoV-2 RNA                                                  | RdRp and E genes                         | 100 copies/mL                                                                                                                                                                                                                                                                 | 100%                                                                                                           | Approved (H)                                                                                                                                                                                                                 |
| OSANG Healthcare              | GeneFinder™ COVID-19 Plus RealAmp Kit   | -NP, OP, nasal and MT swabs<br>-BAL<br>-Sputum                            | -RT-PCR test for the qualitative detection of SARS-CoV-2 RNA                                                  | ORF1ab, N and E genes                    | 0.5 copies/μL                                                                                                                                                                                                                                                                 | 100% in NP, OP and BAL swabs                                                                                   | Approved (H)                                                                                                                                                                                                                 |

## In-Vitro Diagnostics for Rapid and High-Accuracy COVID-19 Screening.

|                                  |                                                                          |                                                                                                                 |                                                                                                                      |                                                                                    |                                                                  |                              |                             |
|----------------------------------|--------------------------------------------------------------------------|-----------------------------------------------------------------------------------------------------------------|----------------------------------------------------------------------------------------------------------------------|------------------------------------------------------------------------------------|------------------------------------------------------------------|------------------------------|-----------------------------|
| Fosun Pharma USA Inc.            | Fosun COVID-19 RT-PCR Detection Kit                                      | AN, MT, NP and OP swabs<br>-sputum<br>-lower respiratory tract aspirates<br>-BAL<br>-Nasal and NP wash/aspirate | - RT-PCR test for the qualitative detection of SARS-CoV-2 RNA                                                        | ORF1ab, N and E genes                                                              | 3000 copies /mL                                                  | -PPA: 99.51%<br>-NPA: 96.44% | Approved (H)                |
| KorvaLabs Inc.                   | Curative-Korva SARS-Cov-2 Assay                                          | -OP, NP and nasal swabs<br>-Oral fluid specimens                                                                | -RT-PCR test for the qualitative detection of SARS-CoV-2 RNA                                                         | N gene (N1 and N2 regions)                                                         | 200 copies /mL                                                   | 100% in NP swabs             | Approved (H)                |
| GenoSensor, LLC                  | GS™ COVID-19 RT-PCR KIT                                                  | NP, OP, nasal and MT swabs                                                                                      | -RT-PCR test for the qualitative detection of SARS-CoV-2 RNA with 95% positivity rate for lowest viral concentration | OFR1ab, E and N genes                                                              | 1 copy/μL                                                        | 100%                         | Approved (H)                |
| Maccura Biotechnology (USA) LLC  | SARS-CoV-2 Fluorescent PCR Kit                                           | upper respiratory specimens (e.g., OP swabs, NP swabs, nasal swabs, and MT swabs)                               | -RT-PCR test for the qualitative detection of SARS-CoV-2 RNA with 95% positivity rate for lowest viral concentration | OFR1ab, E and N genes                                                              | 1000 copies/mL                                                   | -PPA: 100%<br>-NPA: 96.7%    | -Approved (H)<br>-CE marked |
| DiaCarta, Inc                    | QuantiVirus™ SARS-CoV-2 Test kit                                         | -NP and OP swabs<br>-Sputum                                                                                     | -RT-PCR test for the qualitative detection of SARS-CoV-2 RNA with 95% positivity rate for lowest viral concentration | OFR1ab, E and N genes                                                              | 100-200 copies/mL depending on the amplification platform used   | -PPA: 95%<br>-NPA: 100%      | Approved (H)                |
| Becton, Dickinson and Company    | BD SARS-CoV-2 Reagents for BD MAX™ System                                | Nasal, NP and OP swabs                                                                                          | - RT-PCR test for the qualitative detection of SARS-CoV-2 RNA                                                        | N gene (regions N1 and N2)                                                         | 40 GE/mL                                                         | -PPA: 95%<br>-NPA: 100%      | Approved (H, M)             |
| InBios International, Inc        | Smart Detect™ SARS-CoV-2 rRT-PCR Kit                                     | NP, AN and MT swabs                                                                                             | - RT-PCR test for the qualitative detection of SARS-CoV-2 RNA                                                        | OFR1ab, E and N genes                                                              | 10-12.5 GE/reaction depending on the used amplification platform | -PPA: 100%<br>-NPA: 96.7%    | Approved (H)                |
| Gnomegen LLC                     | Gnomegen COVID-19 RT-Digital PCR Detection Kit                           | Nasal, NP and OP swabs                                                                                          | - Digital RT-PCR test for the qualitative detection of SARS-CoV-2 RNA<br>-results in ~3 hours                        | N gene (regions N1 and N2)                                                         | 8 copies/reaction                                                | 100%                         | Approved (H)                |
| Co-Diagnostics, Inc.             | Logix Smart Coronavirus Disease 2019 (COVID-19) Kit                      | -BAL, sputum and TA<br>- NP and OP swab                                                                         | - RT-PCR test for the qualitative detection of SARS-CoV-2 RNA<br>-results are in 63-90 mins                          | RdRp gene                                                                          | 4.29 copies/μL                                                   | 100%                         | -Approved (H)<br>-CE marked |
| ScienCell™ Research Laboratories | ScienCell SARS-CoV-2 Coronavirus Real-time RT-PCR (RTqPCR) Detection Kit | -Nasal, NP and OP swabs<br>-BAL                                                                                 | - RT-PCR test for the qualitative detection of SARS-CoV-2 RNA                                                        | N gene (viral) and RPP30 gene (human, internal control to assess specimen quality) | 10 <sup>0.5</sup> copies/μL                                      | 100%                         | Approved (H)                |
| Luminex Corporation              | ARIES SARS-CoV-2 Assay                                                   | NP swabs                                                                                                        | -Multiplexed RT-PCR test for the qualitative detection of SARS-CoV-2 RNA                                             | ORF1ab and N genes                                                                 | 7.5x10 <sup>4</sup> GE/mL                                        | 100%                         | Approved (H, M)             |

|                                     |                                                               |                                                                 |                                                                                                                                                                         |                                             |                                                                                                                                                  |                            |                                                                                                                                               |
|-------------------------------------|---------------------------------------------------------------|-----------------------------------------------------------------|-------------------------------------------------------------------------------------------------------------------------------------------------------------------------|---------------------------------------------|--------------------------------------------------------------------------------------------------------------------------------------------------|----------------------------|-----------------------------------------------------------------------------------------------------------------------------------------------|
|                                     |                                                               |                                                                 | -can run up to 144 tests per day<br>-time-to-results is ~2 hours with minimal hands-on time for samples processing                                                      |                                             |                                                                                                                                                  |                            |                                                                                                                                               |
| Becton, Dickinson and Company (BD)  | BioGX SARS-CoV-2 Reagents for BD MAX System                   | NP and OP swabs                                                 | - RT-PCR test for the qualitative detection of SARS-CoV-2 RNA<br>-Fully automated system that can process up to 24 samples simultaneously<br>- Results in 2-3 hours     | N gene (N1 and N2 regions)                  | 40 GE/mL                                                                                                                                         | 100%                       | Approved (H, M)                                                                                                                               |
| Ipsium Diagnostics, LLC             | COV-19 IDx assay                                              | NP and OP swabs                                                 | - RT-PCR test for the qualitative detection of SARS-CoV-2 RNA                                                                                                           | N gene                                      | 8.5 copies/ $\mu$ L                                                                                                                              | 100%                       | Approved (H)                                                                                                                                  |
| QIAGEN GmbH                         | QIAstat-Dx Respiratory SARS-CoV-2 Panel                       | NP swabs                                                        | -Multiplex RT-PCR for the qualitative detection and differentiation of SARS-CoV-2 RNA from other types and subtypes of viruses<br>-Results in ~1 hour                   | RdRp and E genes                            | 500 copies/mL                                                                                                                                    | 100%                       | - Approved (H, M)<br>-CE marked<br>-Health Canada authorization<br>-Philippines FDA<br>- Australian Therapeutics Administration authorization |
| NeuMoDx Molecular, Inc.             | NeuMoDx SARS-CoV-2 Assay                                      | Nasal, NP and OP swabs                                          | - RT-PCR test for the qualitative detection of SARS-CoV-2 RNA<br>-Results in ~ 1 hour                                                                                   | N and Nsp2 (non-structural protein 2) genes | 150 copies/mL                                                                                                                                    | 100%                       | - Approved (H, M)<br>- CE marked<br>- Singapore Health Sciences Authority                                                                     |
| Luminex Molecular Diagnostics, Inc. | NxTAG CoV Extended Panel Assay                                | NP swabs                                                        | - RT-PCR test for the qualitative detection of SARS-CoV-2 RNA<br>-highly scalable mass production and cost-effective<br>-Can process up to 96 samples in around 4 hours | ORF1ab, E and N genes                       | 5000 GE/mL                                                                                                                                       | 100%                       | Approved (H)                                                                                                                                  |
| BGI Genomics Co. Ltd                | Real-Time Fluorescent RT-PCR Kit for Detecting SARS-2019-nCoV | -OP, NP, AN, MT and nasal swabs<br>-Nasal wash/aspirate<br>-BAL | - Fluorescent RT-PCR test for the qualitative detection of SARS-CoV-2 RNA<br>- Results in ~3 hours                                                                      | ORF1ab gene                                 | 100 copies/mL                                                                                                                                    | -PPA: 88.1%<br>-NPA: 99.6% | - Approved (H)<br>- CE marked                                                                                                                 |
| Avellino Lab USA, Inc.              | AvellinoCoV2 test                                             | NP and OP swabs                                                 | - RT-PCR test for the qualitative detection of SARS-CoV-2 RNA                                                                                                           | N gene (N1 and N3 regions)                  | 55 copies/ $\mu$ L                                                                                                                               | 100%                       | Approved (H, M)                                                                                                                               |
| PerkinElmer, Inc.                   | PerkinElmer New Coronavirus Nucleic Acid Detection Kit        | NP and OP swabs                                                 | - RT-PCR test for the qualitative detection of SARS-CoV-2 RNA                                                                                                           | ORF1ab and N genes                          | -9.307 copies/mL for the ORF1ab target<br>-30.467 copies/mL for the N target. (LoD varies according to specimen origin and amplification system) | 100%                       | -Approved (H)<br>-CEmarked                                                                                                                    |
| Mesa Biotech Inc.                   | Accula SARS-Cov-2 Test                                        | Nasal swabs                                                     | - RT-PCR and lateral flow technology test for the qualitative detection of SARS-CoV-2 RNA                                                                               | N gene                                      | 100 copies/reaction                                                                                                                              | 100%                       | -Approved (H, M)<br>-Authorized for distribution and use in patient care settings under a                                                     |

## In-Vitro Diagnostics for Rapid and High-Accuracy COVID-19 Screening.

|                                            |                                                        |                                                                                                                |                                                                                                                                                                                                                                                |                            |                                                                         |                                                                                                                                                                          |                                                                                                                                                                                                                                                                                                                                    |
|--------------------------------------------|--------------------------------------------------------|----------------------------------------------------------------------------------------------------------------|------------------------------------------------------------------------------------------------------------------------------------------------------------------------------------------------------------------------------------------------|----------------------------|-------------------------------------------------------------------------|--------------------------------------------------------------------------------------------------------------------------------------------------------------------------|------------------------------------------------------------------------------------------------------------------------------------------------------------------------------------------------------------------------------------------------------------------------------------------------------------------------------------|
|                                            |                                                        |                                                                                                                | -Reaction time is 30 minutes<br>-Palm-sized system that can be used in non-laboratory-based conditions                                                                                                                                         |                            |                                                                         |                                                                                                                                                                          | CLIA Certificate of Waiver (Certificate of Compliance)                                                                                                                                                                                                                                                                             |
| BioFire Defense, LLC                       | BioFire® COVID-19 Test                                 | NP swabs                                                                                                       | -Multiplexed RT-PCR test for the qualitative detection of SARS-CoV-2 RNA                                                                                                                                                                       | ORF1ab and ORF8 gene       | 3.3x10 <sup>2</sup> GC/mL                                               | -PPA: 80%<br>-NPA: 100%                                                                                                                                                  | - Approved (H, M)<br>- CE marked                                                                                                                                                                                                                                                                                                   |
| Cepheid®                                   | Xpert® Xpress SARS-CoV-2 test                          | -NP, OP, nasal, and MT swabs<br>-Nasal wash/aspirate                                                           | -Automated rapid RT-PCR test for the qualitative detection of SARS-CoV-2 RNA<br>-Delivers results in 2 hours from sample collection to test results<br>- Assay reaction time is 30 minutes with less than 1 min of hands-on sample preparation | E and N (N2 region) genes  | 250 copies/reaction                                                     | 100%                                                                                                                                                                     | -Approved (H, M)<br>-Authorized for distribution and use in patient care settings under a CLIA Certificate of Waiver (Certificate of Compliance)<br>-CE marked<br>-Health Canada authorization<br>-Philippines FDA<br>- Brazilian Health Regulatory Agency authorization<br>- Australian Therapeutics Administration authorization |
| Primerdesign Ltd.                          | Primerdesign Ltd COVID-19 genesig® Real-Time PCR assay | -Nasal and OP swabs<br>-BAL                                                                                    | - RT-PCR test for the qualitative detection of SARS-CoV-2 RNA                                                                                                                                                                                  | ORF1ab gene                | 0.33 copies/μL                                                          | -PPA is 94.7% in 38 positive samples with 1-2xLOD of viral concentration and 100% in 12 samples with 3-5x LoD viral concentration<br>-NPA is 100% in 50 negative samples | Approved (H)                                                                                                                                                                                                                                                                                                                       |
| GenMark Diagnostics, Inc.                  | ePlex® SARS-CoV-2 Test                                 | NP swab specimens (NPS) eluted in viral transport media (VTM) specimen                                         | -Automated multiplexed qualitative nucleic acid detection of SARS-CoV-2<br>-Less than 2 minutes of sample preparation and less than 2 hours for results                                                                                        | N protein                  | 10 <sup>3</sup> copies/mL                                               | -PPA: 94.4%<br>-NPA: 100%                                                                                                                                                | Approved (H, M)                                                                                                                                                                                                                                                                                                                    |
| DiaSorin Molecular LLC                     | Simplexa COVID-19 Direct assay                         | -NP and nasal swabs<br>-BAL                                                                                    | - RT-PCR test for the qualitative detection of SARS-CoV-2 RNA<br>-Results within 1 hours excluding RNA extraction                                                                                                                              | ORF1ab and S genes         | -500 copies/mL for NP samples<br>-242 copies/mL for Nasal swabs samples | 100%                                                                                                                                                                     | -Approved (H, M)<br>-CE marked                                                                                                                                                                                                                                                                                                     |
| Abbott Molecular                           | Abbott RealTime SARS-CoV-2 assay                       | -NP and OP swabs<br>-Nasal swabs, self-collected at a health care location or collected by a healthcare worker | - RT-PCR test for the qualitative detection of SARS-CoV-2 RNA                                                                                                                                                                                  | RdRp and N genes           | 100 copies/mL                                                           | -PPA: 94.7%<br>-NPA: 100%                                                                                                                                                | Approved (H)                                                                                                                                                                                                                                                                                                                       |
| Quest Diagnostics Infectious Disease, Inc. | Quest SARS-CoV-2 rRT-PCR                               | -NP and OP swabs<br>-Sputum                                                                                    | -Results are obtained in less than 2 days                                                                                                                                                                                                      | N gene (N1 and N3 regions) | 136 copies/mL                                                           | 100%                                                                                                                                                                     | Approved (H)                                                                                                                                                                                                                                                                                                                       |

|                                                                      |                                                                               |                                                                   |                                                                                                                                                                                                                                                                             |                                         |                                                              |      |                                                                                                                                       |
|----------------------------------------------------------------------|-------------------------------------------------------------------------------|-------------------------------------------------------------------|-----------------------------------------------------------------------------------------------------------------------------------------------------------------------------------------------------------------------------------------------------------------------------|-----------------------------------------|--------------------------------------------------------------|------|---------------------------------------------------------------------------------------------------------------------------------------|
|                                                                      |                                                                               | -TA<br>-BAL                                                       |                                                                                                                                                                                                                                                                             |                                         |                                                              |      |                                                                                                                                       |
| Quidel Corporation                                                   | Lyra® SARS-CoV-2 Assay                                                        | NP and OP swabs                                                   | -multiplexed RT-PCR test for the qualitative detection of SARS-CoV-2 RNA<br>-results are obtained in 75 mins excluding RNA extraction                                                                                                                                       | pp1ab (non-structural polyprotein) gene | 0.8 GC/μL                                                    | 100% | -Approved (H)<br>-CE marked<br>-Health Canada authorization                                                                           |
| Laboratory Corporation of America (LabCorp)                          | COVID-19 RT-PCR Test                                                          | -Nasal, NP and OP swabs<br>-Sputum<br>-BAL<br>-Nasal and NP       | - multiplexed RT-PCR test for the qualitative detection of SARS-CoV-2 RNA<br>-Coupled with Pixel by LabCorp™ COVID-19 test home collection kit to self-collect nasal swab specimens at home by individuals                                                                  | N gene (N1, N2, and N3 regions)         | 6.25 copies/μL for NP swabs and 12.5 copies/μL for BAL swabs | 100% | Approved (H)                                                                                                                          |
| Hologic®, Inc.                                                       | Panther Fusion SARS-CoV-2                                                     | NP, nasal, and OP swabs and lower respiratory tract specimens     | - Multiplex RT-PCR test for the qualitative detection of SARS-CoV-2 RNA<br>-Results are obtained in less than 3 hours in each panther fusion system<br>-The system can process up to 1150 tests in 24 hours                                                                 | ORF1ab, S and N genes                   | 10 GE/reaction                                               | 100% | Approved (H)                                                                                                                          |
| Thermo Fisher Scientific, Inc.                                       | TaqPath™ COVID-19 Combo Kit                                                   | -NP, OP, nasal and MT swabs<br>-NP aspirate<br>-BAL               | - Multiplex RT-PCR test for the qualitative detection of SARS-CoV-2 RNA<br>-High throughput system: complete RNA extraction and RT-PCR of up to 94 samples under 3 hours 200                                                                                                | ORF1ab gene (regions 1 and 2)           | 10 <sup>-2</sup> TCID <sub>50</sub> /mL                      | 100% | - Approved (H)<br>- CE Marked<br>- Australian Therapeutic Goods Administration authorization<br>- Singapore Health Sciences Authority |
| Roche Molecular Systems, Inc. (RMS)                                  | cobas® SARS-CoV-2                                                             | Nasal, NP and OP swabs                                            | - RT-PCR test for the qualitative detection of SARS-CoV-2 RNA<br>- Automated sample preparation (RNA extraction and purification)<br>- Results in ~3.5 hours<br>-Can process up to 348 results using the cobas 6800 system or 1056 results using the 8800 system in 8 hours | ORF1ab and E genes                      | 0.009 TCID <sub>50</sub> /mL                                 | 100% | - Approved (H, M)<br>-CE marked                                                                                                       |
| Wadsworth Center, New York State Department of Public Health's (CDC) | New York SARS-CoV-2 Real-time Reverse Transcriptase (RT)-PCR Diagnostic Panel | - NP and OP swabs<br>-Sputum                                      | - RT-PCR test for the qualitative detection of SARS-CoV-2 RNA                                                                                                                                                                                                               | N gene (N1 and N2 regions)              | 25 copies/reaction                                           | 100% | Approved (H)                                                                                                                          |
| Centers for Disease Control and Prevention's (CDC)                   | CDC 2019-nCoV Real-Time RT-PCR Diagnostic Panel (CDC)                         | -NP and OP swabs<br>-sputum<br>-lower respiratory tract aspirates | - RT-PCR test for the qualitative detection of SARS-CoV-2 RNA                                                                                                                                                                                                               | N gene (N1 and N2 regions)              | 10 <sup>0.5</sup> -10 <sup>0</sup> copies/μL                 | 100% | Approved (H)                                                                                                                          |

## In-Vitro Diagnostics for Rapid and High-Accuracy COVID-19 Screening.

|                                   |                                                       |                                                                                    |                                                                                                                  |                                    |                                                                       |                           |                                                                          |
|-----------------------------------|-------------------------------------------------------|------------------------------------------------------------------------------------|------------------------------------------------------------------------------------------------------------------|------------------------------------|-----------------------------------------------------------------------|---------------------------|--------------------------------------------------------------------------|
|                                   |                                                       | -BAL<br>-Nasal and NP wash/aspirate                                                |                                                                                                                  |                                    |                                                                       |                           |                                                                          |
| Abbott Molecular Inc.             | Alinity m SARS-CoV-2 assay                            | -NP and OP swabs<br>-BAL                                                           | - RT-PCR test for the qualitative detection of SARS-CoV-2 RNA                                                    | RdRp and N genes                   | 100 copies/mL                                                         | -PPA: 100%<br>-NPA: 96.5% | Approved (H, M)                                                          |
| 1drop Inc.                        | 1copy COVID-19 qPCR Multi Kit                         | -NP, OP, AN, MT and swabs<br>- Nasal and NP wash/aspirate                          | - RT-PCR test for the qualitative detection of SARS-CoV-2 RNA<br>- Results are obtained in less than 2 hours     | E and RdRp genes                   | 200 copies/mL                                                         | 100%                      | Approved (H)                                                             |
| Applied DNA Sciences, Inc.        | Linea COVID-19 Assay Kit                              | -Nasal, NP, OP, AN, MT and swabs<br>- Nasal and NP wash/aspirate                   | - RT-PCR test for the qualitative detection of SARS-CoV-2 RNA                                                    | S gene (S1 and S2)                 | 1.25 copies/ $\mu$ L                                                  | -PPA: 98%<br>-NPA: 93%    | Approved (H)                                                             |
| GeneMatrix, Inc.                  | NeoPlex COVID-19 Detection Kit                        | -NP, OP, MT and nasal swabs<br>-Sputum, TAs and BAL                                | -Multiplex RT-Real-time PCR Reagents for SARS-CoV-2 Detection                                                    | RdRp and N genes                   | 50 copies/reaction for NP swabs and sputum                            | 100%                      | -Approved (H)<br>-CE marked                                              |
| Hologic, Inc.                     | Aptima® SARS-CoV-2 assay                              | NP, nasal, MT and OP swabs<br>- Nasal and NP wash/aspirate                         | - RT-PCR test for the qualitative detection of SARS-CoV-2 RNA                                                    | ORF1ab                             | 0.01 TCID <sub>50</sub> /mL                                           | -PPA: 100%<br>-NPA: 98.2% | Approved (H)                                                             |
| Assurance Scientific Laboratories | Assurance SARS-CoV-2 Panel                            | -Nasal, NP and OP swabs                                                            | - RT-PCR test for the qualitative detection of SARS-CoV-2 RNA<br>-The test is coupled with a self-collection kit | N gene (N1 and N2 regions)         | -29 copies/ $\mu$ L for N1 target<br>-9 copies/ $\mu$ L for N2 target | 100%                      | Approved (H)                                                             |
| Fulgent Therapeutics, LLC         | Fulgent COVID-19 by RT-PCR test                       | Nasal, NP and OP swabs                                                             | - RT-PCR test for the qualitative detection of SARS-CoV-2 RNA<br>-The test is coupled with a self-collection kit | N gene                             | 5 copies/ $\mu$ L                                                     | 100%                      | Approved (H)                                                             |
| Quidel Corporation                | Lyra® Direct SARS-CoV-2 Assay                         | Nasal, NP and OP swabs                                                             | - RT-PCR test for the qualitative detection of SARS-CoV-2 RNA                                                    | Non-structural polyprotein (pp1ab) | $1.28 \times 10^4$ GE/mL                                              | -PPA: 97%<br>-NPA: 100%   | Approved (H)                                                             |
| P23 Labs, LLC.                    | P23 Labs TaqPath SARS-CoV-2 Assay                     | -OP, NP, AN and MT swabs<br>- Nasal and NP wash/aspirate<br>-BAL                   | - RT-PCR test for the qualitative detection of SARS-CoV-2 RNA<br>-The test is coupled with a self-collection kit | N, S and ORF1ab genes              | 10 copies/ $\mu$ L                                                    | 100%                      | Approved (H)                                                             |
| SolGent Co., Ltd.                 | DiaPlexQ™ Novel Coronavirus (2019-nCoV) Detection Kit | -OP, NP, AN and MT swabs<br>- Nasal and NP wash/aspirate<br>-BAL<br>-Sputum        | - RT-PCR test for the qualitative detection of SARS-CoV-2 RNA<br>- Results in ~2 hours                           | ORF1a and N genes                  | 200 copies/mL                                                         | 100%                      | -Approved (H)<br>-CE marked<br>-EUA from Korean, Philippines authorities |
| BioCore Co., Ltd.                 | BioCore 2019-nCoV Real Time PCR Kit                   | -OP, NP, AN and MT swabs<br>- Nasal and NP wash/aspirate<br>-BAL<br>-Sputum and TA | - RT-PCR test for the qualitative detection of SARS-CoV-2 RNA                                                    | N and RdRp genes                   | 500 copies/mL                                                         | 100%                      | Approved (H)                                                             |
| Dbi SpectronRx                    | Hymon SARS-CoV-2 Test Kit                             | -Nasal, OP, NP, AN and MT swabs                                                    | - RT-PCR test for the qualitative detection of SARS-CoV-2 RNA                                                    | N and E genes                      | 5 copies/reaction                                                     | 100%                      | Approved (H)                                                             |

|                                           |                                     |                                                                             |                                                                                                                                                                               |                            |                           |                                                                                                         |                                                                                             |
|-------------------------------------------|-------------------------------------|-----------------------------------------------------------------------------|-------------------------------------------------------------------------------------------------------------------------------------------------------------------------------|----------------------------|---------------------------|---------------------------------------------------------------------------------------------------------|---------------------------------------------------------------------------------------------|
|                                           |                                     | -BAL                                                                        |                                                                                                                                                                               |                            |                           |                                                                                                         |                                                                                             |
| Gravity Diagnostics, LLC                  | Gravity Diagnostics COVID-19 Assay  | -Nasal, NP and OP swabs<br>-BAL                                             | - RT-PCR test for the qualitative detection of SARS-CoV-2 RNA                                                                                                                 | N gene (N1 and N2 regions) | 2.4 copies/μL             | 100%                                                                                                    | Approved (H)                                                                                |
| Phosphorus Diagnostics LLC                | Phosphorus COVID-19 RT-qPCR Test    | Saliva specimens                                                            | - RT-PCR test for the qualitative detection of SARS-CoV-2 RNA<br>-The test is coupled with a self-collection kit                                                              | N gene (N1 and N2 regions) | 5 copies/μL               | -PPA: 97.1%<br>-NPA: 96.5%                                                                              | Approved (H)                                                                                |
| Genetron Health (Beijing) Co., Ltd.       | Genetron SARS-CoV-2 RNA Test        | OP, NP, AN and MT swabs                                                     | - RT-PCR test for the qualitative detection of SARS-CoV-2 RNA                                                                                                                 | ORF1ab and N genes         | 1000 copies/mL            | -PPA:100%<br>-NPA: 97.1%                                                                                | Approved (H)                                                                                |
| Euroimmun US Inc.                         | EURORealTime SARS-CoV-2             | -MT, NP, and OP swabs<br>-BAL                                               | - RT-PCR test for the qualitative detection of SARS-CoV-2 RNA                                                                                                                 | ORF1ab and N genes         | 150 copies/mL             | PPA:96%<br>NPA: 100%                                                                                    | - Approved (H)<br>-CE marked<br>- Australian Therapeutic Goods Administration authorization |
| ChromaCode Inc.                           | HDPCTM SARS-CoV-2 Assay             | -NP, OP, AN and MT swabs<br>-Nasal aspirate/wash<br>-BAL                    | - RT-PCR test for the qualitative detection of SARS-CoV-2 RNA                                                                                                                 | N gene (N1 and N2 regions) | 1000 copies/mL            | QuantStudio 7system:<br>-PPA: 100%<br>-NPA: 96.7%<br>QuantStudio 12K Flex:<br>-PPA: 100%<br>-NPA: 96.7% | Approved (H)                                                                                |
| Illumina Inc.                             | Illumina® COVIDSeq™ Test            | -OP, NP, AN and MT swabs<br>- Nasal and NP wash/aspirate<br>-BAL            | Next-Generation Sequencing (NGS) in vitro diagnostic test                                                                                                                     |                            | 1000 copies/mL            | -PPA: 98.1%<br>-NPA: 97.4%                                                                              | Approved (H)                                                                                |
| TBG Biotechnology Corp                    | ExProbe™ SARS-CoV-2 Testing Kit     | -OP, NP, AN and MT swabs<br>- Nasal and NP wash/aspirate<br>-BAL            | - RT-PCR test for the qualitative detection of SARS-CoV-2 RNA                                                                                                                 | RdRp, N and E genes        | 10 copies/μL              | -PPA: 100%<br>-NPA: 99.5%                                                                               | Approved (H)                                                                                |
| Tide Laboratories, LLC                    | DTPM COVID-19 RT-PCR test           | NP, OP and MT swabs                                                         | - RT-PCR test for the qualitative detection of SARS-CoV-2 RNA                                                                                                                 | N gene                     | 22 GE/ μL                 | 100%                                                                                                    | Approved (H)                                                                                |
| Xiamen Zeesan Biotech Co., Ltd.           | SARS-CoV-2 Test Kit (Real-time PCR) | -NP, OP, AN and MT swabs<br>-Nasal and NP wash/aspirate<br>-BAL             | - RT-PCR test for the qualitative detection of SARS-CoV-2 RNA                                                                                                                 | ORF1 and N genes           | 200 copies/mL             | 100%                                                                                                    | -Approved (H)<br>-CE marked                                                                 |
| University of California San Diego Health | UCSD RC SARS-CoV-2 Assay            | -Self-collected nasal swabs<br>-Clinician collected NP, OP, AN and MT swabs | - RT-PCR test for the qualitative detection of SARS-CoV-2 RNA<br>-The test is limited to University of California San Diego Health at Center for Advanced Laboratory Medicine | ORF1ab gene                | N.A.                      | -PPA is >96%<br>-NPA is >96%                                                                            | Approved (H)                                                                                |
| Clinical Reference Laboratory, Inc.       | CRL Rapid Response                  | Saliva specimens                                                            | - reverse RT-PCR test for the qualitative detection of SARS-CoV-2 RNA<br>-The test is coupled with a self-collection kit                                                      | RdRp gene                  | 250 copies/mL             | 100%                                                                                                    | Approved (H)                                                                                |
| Eli Lilly and Company                     | Lilly SARS-CoV-2 Assay              | -NP, OP, AN and MT swabs<br>-Nasal wash/aspirate<br>-BAL                    | - RT-PCR test for the qualitative detection of SARS-CoV-2 RNA                                                                                                                 | N gene (N1 and N2 regions) | 10 <sup>3</sup> copies/mL | -PPA: 100%<br>-NPA: 93.3%                                                                               | Approved (H)                                                                                |

## In-Vitro Diagnostics for Rapid and High-Accuracy COVID-19 Screening.

|                                                                                             |                                                                                           |                                                                            |                                                                                                                                                                                        |                            |                                                                                                              |                                                                             |                               |
|---------------------------------------------------------------------------------------------|-------------------------------------------------------------------------------------------|----------------------------------------------------------------------------|----------------------------------------------------------------------------------------------------------------------------------------------------------------------------------------|----------------------------|--------------------------------------------------------------------------------------------------------------|-----------------------------------------------------------------------------|-------------------------------|
| Sandia National Laboratories                                                                | SNL-NM 2019 nCoV Real-Time RT-PCR Diagnostic Assay                                        | -NP, OP, AN and MT swabs<br>-Nasal wash/aspirate<br>-BAL                   | - RT-PCR test for the qualitative detection of SARS-CoV-2 RNA                                                                                                                          | N gene                     | 6.25 copies/ $\mu$ L                                                                                         | 100%                                                                        | Approved (H)                  |
| Jiangsu CoWin Biotech Co., Ltd.                                                             | Novel Coronavirus (SARS-CoV-2) Fast Nucleic Acid Detection Kit (PCR-Fluorescence Probing) | OP swabs                                                                   | - RT-PCR test for the qualitative detection of SARS-CoV-2 RNA                                                                                                                          | ORF1ab and N genes         | 300 copies/mL                                                                                                | 100%                                                                        | Approved (H)                  |
| Helix OpCo LLC (dba Helix)                                                                  | Helix COVID-19 Test                                                                       | NP, OP, AN and MT swabs                                                    | - RT-PCR test for the qualitative detection of SARS-CoV-2 RNA                                                                                                                          | N, S and ORF1ab genes      | 1000 genome copy equivalents/mL                                                                              | -PPA: 96.7%<br>-NPA: 100%                                                   | Approved (H)                  |
| DiaCarta, Inc.                                                                              | Quantivirus SARS-CoV-2 Multiplex Test Kit                                                 | -Nasal, NP and OP swabs<br>-Sputum                                         | - RT-PCR test for the qualitative detection of SARS-CoV-2 RNA<br>- Results in <2 hours                                                                                                 | ORF1ab                     | -100 copies/mL in ABI QuantStudio 5 and Bio-Rad CFX 384<br>-50 copies/mL in ABI 7500 Fast Dx system          | -PPA: 97.6%<br>-NPA: 100%                                                   | Approved (H)                  |
| Access Genetics, LLC                                                                        | OraRisk COVID-19 RT-PCR                                                                   | Nasal and NP swabs                                                         | - RT-PCR test for the qualitative detection of SARS-CoV-2 RNA                                                                                                                          | RdRp gene                  | 15 viral copies/ $\mu$ L                                                                                     | NP swabs:<br>PPA and NPA: 100%<br>Nasal swabs:<br>-PPA: 100%<br>-NPA: 95.7% | Approved (H)                  |
| Boston Heart Diagnostics                                                                    | Boston Heart COVID-19 RT-PCR Test                                                         | -NP, OP, MT and nasal swabs<br>-NP aspirate<br>-BAL                        | - RT-PCR test for the qualitative detection of SARS-CoV-2 RNA                                                                                                                          | N, S and ORF1ab genes      | 250 copies/mL                                                                                                | -PPA: 96.7%<br>-NPA: 96.7%                                                  | Approved (H)                  |
| KogeneBiotech Co., Ltd.                                                                     | PowerChek 2019-nCoV Real-time PCR Kit                                                     | -NP, OP, AN and MT swabs<br>-Nasal and NP wash/aspirate<br>-BAL<br>-Sputum | - RT-PCR test for the qualitative detection of SARS-CoV-2 RNA                                                                                                                          | RdRp and E genes           | 4 copies/ $\mu$ L                                                                                            | 100%                                                                        | Approved (H)                  |
| Trax Management Services Inc.                                                               | PhoenixDx SARS-CoV-2 Multiplex                                                            | -NP, OP, AN and MT swabs<br>-BAL                                           | - RT-PCR test for the qualitative detection of SARS-CoV-2 RNA                                                                                                                          | ORF1ab and N genes         | 50 copies/ $\mu$ L                                                                                           | 100%                                                                        | Approved (H)                  |
| Compass Laboratory Services, LLC                                                            | Compass Laboratory Services SARS-CoV2 Assay                                               | -NP, OP, AN and MT swabs<br>-Nasal and NP wash/aspirate                    | -RT-PCR test for the qualitative detection of SARS-CoV-2 RNA                                                                                                                           | N.A.                       | 5 copies/ $\mu$ L                                                                                            | -PPA: 100%<br>-NPA: 96%                                                     | Approved (H)                  |
| Boston Medical Center                                                                       | BMC-CReM COVID-19 Test                                                                    | -NP, OP, AN and MT swabs<br>-Nasal and NP wash/aspirate<br>-BAL            | -RT-PCR test for the qualitative detection of SARS-CoV-2 RNA                                                                                                                           | N gene (N1 and N2 regions) | 1 gene copy/ $\mu$ L                                                                                         | 100%                                                                        | Approved (H)                  |
| UCSF Health Clinical Laboratories, UCSF Clinical Labs at China Basin                        | SARS-CoV-2 RNA DETECTR Assay                                                              | -NP, OP, AN and MT swabs<br>-Nasal and NP wash/aspirate                    | -RT-PCR test for the qualitative detection of SARS-CoV-2 RNA                                                                                                                           | N gene                     | 20 copies/ $\mu$ L                                                                                           | -PPA: 95%<br>-NPA: 100%                                                     | Approved (H)                  |
| BioSewoom, Inc.                                                                             | Real-Q 2019-nCoV Detection Kit                                                            | -NP, OP, nasal and MT swabs<br>-Tracheal and NP aspirate<br>-BAL           | -RT-PCR test for the qualitative detection of SARS-CoV-2 RNA                                                                                                                           | RdRp and E genes           | 6.25 copies/ $\mu$ L                                                                                         | 100%                                                                        | - Approved (H)<br>- CE marked |
| Clinical Research Sequencing Platform (CRSP), LLC at the Broad Institute of MIT and Harvard | CRSP SARS-CoV-2 Real-time Reverse Transcriptase (RT)-PCR Diagnostic Assay                 | -NP, OP, AN and MT swabs<br>-Nasal and NP wash/aspirate<br>-BAL            | -RT-PCR test for the qualitative detection of SARS-CoV-2 RNA<br>-Testing is limited to the Clinical Research Sequencing Platform (CRSP), LLC at the Broad Institute of MIT and Harvard | N gene (N1 and N2 regions) | -4.8 x 10 <sup>3</sup> copies/mL for Assay Version 1<br>-1.6 x 10 <sup>3</sup> copies/mL for Assay Version 2 | 100%                                                                        | Approved (H)                  |

|                                                  |                                                            |                                                                                                                           |                                                                                                                                                                   |                                   |                                                                          |                             |              |
|--------------------------------------------------|------------------------------------------------------------|---------------------------------------------------------------------------------------------------------------------------|-------------------------------------------------------------------------------------------------------------------------------------------------------------------|-----------------------------------|--------------------------------------------------------------------------|-----------------------------|--------------|
| Enzo Life Sciences, Inc.                         | AMPIPROBE SARS-CoV-2 Test System                           | -NP, OP, AN and MT swabs<br>-Nasal and NP wash/aspirate                                                                   | -Multiplexed RT-PCR test for the qualitative detection of SARS-CoV-2 RNA                                                                                          | N gene (N1 and N2 regions)        | 280 copies/mL                                                            | -PPA: 96.2%<br>-NPA: 98%    | Approved (H) |
| Access Bio, Inc.                                 | CareStart COVID-19 MDx RT-PCR                              | -NP, OP, nasal swabs<br>-Nasal and NP                                                                                     | -RT-PCR test for the qualitative detection of SARS-CoV-2 RNA                                                                                                      | RdRp and N genes                  | N.A.                                                                     | 100%                        | Approved (H) |
| Gene By Gene                                     | Gene By Gene SARS-CoV-2 Detection Test                     | NP and nasal swabs                                                                                                        | -RT-PCR test for the qualitative detection of SARS-CoV-2 RNA                                                                                                      | N gene (N1 and N2 regions)        | 6.25 copies/ $\mu$ L                                                     | 100%                        | Approved (H) |
| Laboratorio Clinico Toledo                       | Laboratorio Clinico Toledo SARS-CoV-2 Assay                | -Nasal, NP, MT, OP, BAL swabs                                                                                             | -RT-PCR test for the qualitative detection of SARS-CoV-2 RNA                                                                                                      | N and E genes                     | 203cp/mL                                                                 | 100                         | Approved (H) |
| Centers for Disease Control and Prevention (CDC) | Influenza SARS-CoV-2 (Flu SC2) Multiplex Assay             | -NP, OP, and nasal swabs.<br>-BAL, lower respiratory tract aspirates, and nasopharyngeal wash/aspirate or nasal aspirate. | - Multiplexed RT-PCR test for the simultaneous qualitative detection and differentiation of SARS-CoV-2, influenza A virus, and/or influenza B virus nucleic acid. | N gene                            | 10 <sup>6.5</sup> TCID <sub>50</sub> /mL                                 | N.A.                        | Approved (H) |
| CENTOGENE US, LLC                                | Centofast-SARS-CoV-2 RT-PCR Assay                          | -Dry OP swabs                                                                                                             | -RT-PCR test for the qualitative detection of SARS-CoV-2 RNA<br>-Testing is limited to CENTOGENE or other laboratories designated by CENTOGENE                    | E and RdRP genes.                 | 5 viral copies/ $\mu$ L                                                  | 100%                        | Approved (H) |
| Psomagen, Inc.                                   | Psoma COVID-19 RT Test                                     | -nasal, MT, NP, OP swabs<br>-BAL                                                                                          | -rRT-PCR test for the qualitative detection of SARS-CoV-2 RNA                                                                                                     | N gene (N1 and N2 regions)        | 1 cp/ $\mu$ L                                                            | 100%                        | Approved (H) |
| TNS Co., Ltd (Bio TNS)                           | COVID-19 RT-PCR Peptide Nucleic Acid (PNA) kit             | -NP, OP, AN, MT, BAL swabs<br>- nasopharyngeal wash/aspirates or nasal aspirates                                          | -RT-PCR test for the qualitative detection of SARS-CoV-2 RNA                                                                                                      | RdRP and N genes                  | 3.715 copies/ $\mu$ L for N gene<br>-2.524 copies/ $\mu$ L for RdRP gene | 100%                        | Approved (H) |
| LifeHope Labs                                    | LifeHope 2019-nCoV Real-Time RT-PCR Diagnostic Panel       | -Nasal, MT, NP, and OP swabs<br>-BAL                                                                                      | -rRT-PCR test for the qualitative detection of SARS-CoV-2 RNA                                                                                                     | N gene (N1 and N2 regions)        | 2.5 GE/ $\mu$ L                                                          | 100%                        | Approved (H) |
| Acupath Laboratories, Inc                        | Acupath COVID-19 Real-Time (RT-PCR) Assay                  | -NP swab, NP aspirate, and BAL                                                                                            | -RT-PCR test for the qualitative detection of SARS-CoV-2 RNA                                                                                                      | ORF1ab, N, and S genes            | 25 copies/ $\mu$ L                                                       | 100%                        | Approved (H) |
| Inform Diagnostics, Inc.                         | Inform Diagnostics SARS-CoV-2 RT-PCR Assay                 | -NP, OP, AN, MT swabs<br>-NP wash/aspirate or nasal aspirates<br>-BAL                                                     | -RT-PCR test for the qualitative detection of SARS-CoV-2 RNA                                                                                                      | N gene (N1 and N2 regions)        | 20 copies/ $\mu$ L                                                       | -PPA: 93.94%<br>-NPA: 100%  | Approved (H) |
| Diagnostic Solutions Laboratory, LLC             | DSL COVID-19 Assay                                         | -nasal, MT, NP, OP swabs<br>-BAL                                                                                          | -RT-PCR test for the qualitative detection of SARS-CoV-2 RNA                                                                                                      | N (N1 and N3 regions) and S genes | 10 cp/swab                                                               | -PPA: 100%<br>-NPA: 97%     | Approved (H) |
| PreciGenome LLC                                  | FastPlex Triplex SARS-CoV-2 detection kit (RT-Digital PCR) | -OP swabs                                                                                                                 | -Digital RT-PCR test for the qualitative detection of SARS-CoV-2 RNA                                                                                              | ORF1ab and N genes                | 571.4 copies/mL                                                          | -PPA: 96.3% -<br>NPA: 96.7% | Approved (H) |
| PlexBio Co., Ltd.                                | IntelliPlex SARS-CoV-2 Detection Kit                       | -NP, OP, AN, MT nasal swabs.<br>- nasopharyngeal                                                                          | -RT-PCR test for the qualitative detection of SARS-CoV-2 RNA<br>- Used in combination with $\pi$ Code technology and the IntelliPlex                              | RdRP, E, and N genes              | 140 copies/mL                                                            | N.A.                        | Approved (H) |

## In-Vitro Diagnostics for Rapid and High-Accuracy COVID-19 Screening.

|                                                                                 |                                                    |                                                                                        |                                                                                                                                                                                       |                            |                                                        |                              |                                                    |
|---------------------------------------------------------------------------------|----------------------------------------------------|----------------------------------------------------------------------------------------|---------------------------------------------------------------------------------------------------------------------------------------------------------------------------------------|----------------------------|--------------------------------------------------------|------------------------------|----------------------------------------------------|
|                                                                                 |                                                    | wash/aspirate or nasal aspirates<br>-BAL                                               | 1000 $\pi$ Code Processor and PlexBio 100 Fluorescent Analyzer with DeXipher software                                                                                                 |                            |                                                        |                              |                                                    |
| University of Texas MD Anderson Cancer Center, Molecular Diagnostics Laboratory | MD Anderson High-throughput SARS-CoV-2 RT-PCR Assa | -NP, OP, MT, and nasal swabs.                                                          | -RT-PCR test for the qualitative detection of SARS-CoV-2 RNA<br>-Testing is limited to the Molecular Diagnostic Laboratory (MDL) at the University of Texas MD Anderson Cancer Center | N1 and N2 genes            | 5 copies/ $\mu$ L                                      | 100%                         | Approved (H)                                       |
| HealthQuest Esoterics                                                           | HealthQuest Esoterics TaqPath SARS-CoV-2 Assay     | -NP, OP, AN, MT nasal swabs.<br>- NP wash/aspirate or nasal aspirates<br>-BAL          | -RT-PCR test for the qualitative detection of SARS-CoV-2 RNA                                                                                                                          | ORF1ab, N, and S genes     | 20 copies/ $\mu$ L                                     | 100%                         | Approved (H)                                       |
| University of Alabama at Birmingham Fungal Reference Lab                        | FRL SARS CoV-2 Test                                | -nasal, NP, OP, MT, AN swabs<br>- nasopharyngeal wash/aspirate, nasal aspirate<br>-BAL | -RT-PCR test for the qualitative detection of SARS-CoV-2 RNA<br>-Testing is limited to the UAB Fungal Reference Lab in Birmingham, Alabama                                            | N gene (N1 region)         | 125 copies/mL                                          | 100%                         | Approved (H)                                       |
| Gencurix, Inc.                                                                  | GenePro SARS-CoV-2 Test                            | -NP, OP, AN, and MT swabs<br>- NP wash/aspirate, nasal aspirate<br>-BAL                | -RT-PCR test for the qualitative detection of SARS-CoV-2 RNA                                                                                                                          | Orf1ab and E genes         | 840 GE/mL                                              | 100%                         | - Approved (H)<br>- CE marked<br>- Philippines FDA |
| Jiangsu Bioperfectus Technologies Co., Ltd.                                     | COVID-19 Coronavirus Real Time PCR Kit             | -NP, OP, AN, MT swabs<br>- nasal aspirates, nasal washes<br>-BAL and sputum            | - Fluorescent RT-PCR test for the qualitative detection of SARS-CoV-2 RNA                                                                                                             | ORF1ab and N genes         | 3.5 $\times$ 100 copies/mL                             | 100%                         | Approved (H)                                       |
| 3B Blackbio Biotech India Ltd., a subsidiary of Kilpest India Ltd.              | TRUPCR SARS-CoV-2 Kit                              | -NP, OP, AN, MT swabs<br>-NP aspirates/washes or nasal aspirates<br>-BAL               | -RT-PCR test for the qualitative detection of SARS-CoV-2 RNA                                                                                                                          | RdRP and N genes           | 10 copies/ $\mu$ L                                     | -PPA: 96.77%<br>-NPA: 96.67% | Approved (H)                                       |
| The Ohio State University Wexner Medical Center                                 | OSUWMC COVID-19 RT-PCR test                        | - Nasal, OP, NP swabs                                                                  | -RT-PCR test for the qualitative detection of SARS-CoV-2 RNA<br>- Testing is limited to the Ohio State University Wexner Medical Center                                               | N gene (N1 and N2 regions) | 0.25 cp/ $\mu$ L                                       | 100%                         | Approved (H)                                       |
| Omnipathology Solutions Medical Corporation                                     | Omni COVID-19 Assay by RT-PCR                      | -NP, OP, AN, MT swab<br>- nasopharyngeal wash/aspirate, nasal aspirate<br>-BAL         | -RT-PCR test for the qualitative detection of SARS-CoV-2 RNA<br>-Testing is limited to Omnipathology Solutions Medical Corporation in Pasadena, California                            | N gene (N1 and N2 regions) | 1.23 copies/ $\mu$ L                                   | -PPA: 96.7%<br>-NPA: 100%    | Approved (H)                                       |
| Applied BioCode, Inc.                                                           | BioCode SARS-CoV-2 Assay                           | -NP, OP, and nasal swabs<br>-BAL                                                       | -RT-PCR test for the qualitative detection of SARS-CoV-2 RNA<br>-End-point detection of amplified DNA                                                                                 | -N gene                    | 1.72 $\times$ 10 <sup>-2</sup> TCID <sub>50</sub> /mL. | 100%                         | Approved (H)                                       |

|                                                                            |                                          |                                                                                                       |                                                                                                                                                                                                                                                                                           |                    |                                                               |                          |                             |
|----------------------------------------------------------------------------|------------------------------------------|-------------------------------------------------------------------------------------------------------|-------------------------------------------------------------------------------------------------------------------------------------------------------------------------------------------------------------------------------------------------------------------------------------------|--------------------|---------------------------------------------------------------|--------------------------|-----------------------------|
|                                                                            |                                          |                                                                                                       | sequences is coupled to barcoded magnetic beads (BMB)                                                                                                                                                                                                                                     |                    |                                                               |                          |                             |
| RTA Laboratories Biological Products Pharmaceutical and Machinery Industry | Diagnovital SARS-CoV-2 Real-Time PCR Kit | -AN, MT, NP, OP<br>- nasopharyngeal wash/aspirates or nasal aspirates<br>-BAL                         | -RT-PCR test for the qualitative detection of SARS-CoV-2 RNA                                                                                                                                                                                                                              | -E and RdRP genes  | 38 copies/mL                                                  | 100%                     | Approved (H)                |
| <b>Isothermal Amplification Assays for SARS-CoV-2 Detection</b>            |                                          |                                                                                                       |                                                                                                                                                                                                                                                                                           |                    |                                                               |                          |                             |
| Atila BioSystems, Inc.                                                     | iAMP® COVID-19 Detection Kit             | NP and OP swab specimen                                                                               | -Real-time fluorescent isothermal PCR assay for the qualitative detection of SARS-CoV-2 RNA<br>- results in <1.5 hours                                                                                                                                                                    | ORF1ab and N genes | 10 copies/µL                                                  | -PPA: 96.3%<br>-NPA: 97% | Approved (H)                |
| Abbott Diagnostics Scarborough, Inc.                                       | Abbott ID NOW COVID-19                   | nasal, NP or throat swabs                                                                             | - Real-time fluorescent isothermal PCR assay for the qualitative detection of SARS-CoV-2 RNA<br>-Result read: 5 minutes for positive results and 13 minutes for negative results                                                                                                          | RdRp gene          | 125 GE/mL                                                     | 100%                     | Approved (H)                |
| SEASUN BIOMATERIALS Inc                                                    | AQ-TOP™ COVID-19 Rapid Detection Kit     | -OP and NP swab<br>- AN and MT nasal swabs,<br>-NP wash/aspirate or nasal aspirate<br>-BAL and sputum | -Real-Time Loop-Mediated Isothermal Amplification (RT-LAMP) test intended for the qualitative detection of nucleic acid from SARS-CoV-2                                                                                                                                                   | ORF1ab             | 7 copies/ µL                                                  | 100%                     | -Approved (H)<br>-CE marked |
| Cue Health Inc.                                                            | Cue COVID-19 Test                        | Nasal swabs                                                                                           | -An isothermal nucleic acid amplification assay intended for the qualitative detection of nucleic acid from the SARS-CoV-2                                                                                                                                                                | N gene             | N.A.                                                          | 100%                     | Approved (H)                |
| <b>CRISPR-based Assays for SARS-CoV-2 Detection</b>                        |                                          |                                                                                                       |                                                                                                                                                                                                                                                                                           |                    |                                                               |                          |                             |
| Sherlock BioSciences, Inc.                                                 | Sherlock CRISPR SARS-CoV-2 Kit           | -Nasal, NP, OP swabs<br>-NP wash/aspirate or nasal aspirate<br>-BAL                                   | -CRISPR-cas based test for qualitative detection of SARS-CoV-2 RNA<br>-Combines Cas 13 enzyme with Cepheid's GeneXpert test processing<br>-RT-LAMP amplification followed by active collateral cleavage activity of Cas13a enzyme. The fluorescent readout is detected by a plate reader. | ORF1ab and N gene  | -6.75 copies/µL for ORF1ab gene<br>-1.35 copies/µL for N gene | 100%                     | Approved (H)                |
| Mammoth Biosciences, Inc.                                                  | SARS-CoV-2 DETECTR Reagent Kit           | -NP, OP, MT, AN swabs<br>-NP wash/aspirate or nasal aspirate                                          | -CRISPR-cas based test for qualitative detection of SARS-CoV-2 RNA<br>-RT-LAMP amplification followed by active collateral                                                                                                                                                                | RdRp and N genes   | 20 copies/µL                                                  | -PPA: 95%<br>-NPA: 100%  | Approved (H)                |

## In-Vitro Diagnostics for Rapid and High-Accuracy COVID-19 Screening.

|                                                          |                                                                 |                                                                                                                                          | cleavage activity of Cas12a enzyme. The fluorescent readout is detected by a plate reader.<br>-Results are obtained in 30-40 mins                              |                                                      |                                    |                                                                                                       |                                                                                                                                                  |
|----------------------------------------------------------|-----------------------------------------------------------------|------------------------------------------------------------------------------------------------------------------------------------------|----------------------------------------------------------------------------------------------------------------------------------------------------------------|------------------------------------------------------|------------------------------------|-------------------------------------------------------------------------------------------------------|--------------------------------------------------------------------------------------------------------------------------------------------------|
| Rapid Lateral Flow Immunoassays for Antibodies Detection |                                                                 |                                                                                                                                          |                                                                                                                                                                |                                                      |                                    |                                                                                                       |                                                                                                                                                  |
| Autobio Diagnostics Co. Ltd.                             | Anti-SARS-CoV-2 Rapid Test                                      | Human plasma or serum                                                                                                                    | -lateral flow immunoassay intended for the qualitative detection and differentiation of IgM and IgG antibodies to SARS-CoV-2<br>- results read after 15-20 min | IgM and IgG antibodies                               | 5 µL of the serum or plasma sample | -PPA: 88.15% in 405 RT-PCR positive samples<br>-NPA: 99.04% in 312 RT-PCR negative samples            | Approved (H)<br>- CE marked                                                                                                                      |
| Cellex Inc.                                              | qSARS-CoV-2 IgG/IgM Rapid Test                                  | Serum, plasma (EDTA, citrate) or venipuncture whole blood specimens                                                                      | -lateral flow immunoassay intended for the qualitative detection and differentiation of IgM and IgG antibodies to SARS-CoV-2<br>- results read after 15-20 min | IgM and IgG antibodies                               | 10µL of the specimen               | -PPA: 88.2% in 128 RT-PCR positive samples<br>-NPA: 92.8% in 250 RT-PCR negative samples              | Approved (H)<br>- CE marked<br>- Brazilian Health Regulatory Agency authorization<br>- Australian Therapeutic Goods Administration authorization |
| Healgen Scientific LLC                                   | COVID-19 IgG/IgM Rapid Test Cassette (Whole Blood/Serum/Plasma) | Human venous whole blood, plasma from anticoagulated blood (Li+ heparin, K2EDTA and sodium citrate), or serum.                           | -A lateral flow immunoassay intended for the qualitative detection and differentiation of IgM and IgG antibodies to SARS-CoV-2                                 | IgM and IgG antibodies                               | 5 µL                               | For IgM:<br>-PPA: 86.7%<br>-NPA: 99%<br>For IgG:<br>-PPA: 96.7%<br>-NPA: 98%                          | Approved (H, M)                                                                                                                                  |
| Hangzhou Biotest Biotech Co., Ltd.                       | RightSign™ COVID-19 IgG/IgM Rapid Test Cassette                 | Human venous whole blood (sodium heparin, EDTA, and sodium citrate), serum or plasma (sodium heparin, potassium EDTA and sodium citrate) | -A rapid lateral flow chromatographic immunoassay intended for the qualitative detection and differentiation of IgM and IgG antibodies to SARS-CoV-2           | IgM and IgG antibodies                               | 10 µL                              | For IgM: PPA and NPA is 100%<br>For IgG:<br>-PPA: 93.3%<br>-NPA: 100%                                 | Approved (H, M)                                                                                                                                  |
| Xiamen Biotime Biotechnology Co., Ltd.                   | BIOTIME SARS-CoV-2 IgG/IgM Rapid Qualitative Test               | Human serum, plasma and venous whole blood                                                                                               | Lateral flow immunoassay intended for qualitative detection and differentiation of IgM and IgG antibodies to SARS-CoV-2                                        | IgM and IgG antibodies                               | 10-15 µL                           | -PPA: 100% (>15 days post symptoms onset)<br>-NPA: 98.46% in serum samples and 100% in plasma samples | Approved (H, M)                                                                                                                                  |
| Access Bio, Inc.                                         | CareStart COVID-19 IgM/IgG                                      | Human serum, plasma and venous whole blood                                                                                               | Immunochromatographic lateral flow assay for the qualitative detection and differentiation of IgM and IgG antibodies to SARS-CoV-2                             | IgM and IgG antibodies against N and S1 RBD proteins | 10 µL                              | -PPA: 98.44%<br>-NPA: 98.90%                                                                          | Approved (H, M)                                                                                                                                  |
| Megna Health, Inc.                                       | Rapid COVID-19 IgM/IgG Combo Test Kit                           | Human serum and plasma                                                                                                                   | Lateral flow immunoassay for qualitative detection                                                                                                             | IgM and IgG antibodies against N protein             | 2 µL                               | -PPA: 90.48%<br>-NPA: 98.95%                                                                          | Approved (H, M)                                                                                                                                  |

|                                                            |                                                               |                                                                                                            |                                                                                                                                                                 |                                                  |                                                                                                                                                                  |                                                                                                                                                                                                                                                                                                                                                                                                   |                                                                                                                                                                           |
|------------------------------------------------------------|---------------------------------------------------------------|------------------------------------------------------------------------------------------------------------|-----------------------------------------------------------------------------------------------------------------------------------------------------------------|--------------------------------------------------|------------------------------------------------------------------------------------------------------------------------------------------------------------------|---------------------------------------------------------------------------------------------------------------------------------------------------------------------------------------------------------------------------------------------------------------------------------------------------------------------------------------------------------------------------------------------------|---------------------------------------------------------------------------------------------------------------------------------------------------------------------------|
|                                                            |                                                               |                                                                                                            | and differentiation of IgM and IgG antibodies to SARS-CoV-2                                                                                                     |                                                  |                                                                                                                                                                  |                                                                                                                                                                                                                                                                                                                                                                                                   |                                                                                                                                                                           |
| Salofa Oy                                                  | Sienna-Clarity COVIBLOCK COVID-19 IgG/IgM Rapid Test Cassette | Human serum, plasma and venous whole blood                                                                 | Membrane-based lateral flow immunoassay for the qualitative detection and differentiation of IgG and IgM antibodies to SARS-CoV-2                               | IgM and IgG antibodies against S1 RBD protein    | 10 µL                                                                                                                                                            | -Combined IgM and IgG PPA: 89.66% in 29 positive samples collected 8-14 days post symptoms onset<br>-Combined IgM and IgG NPA: >89% in samples collected before COIV-19                                                                                                                                                                                                                           | Approved (H, M)                                                                                                                                                           |
| Beijing Wantai Biological Pharmacy Enterprise Co., Ltd.    | WANTAI SARS-CoV-2 Ab Rapid Test                               | Human serum, plasma and venous whole blood                                                                 | Lateral flow assay for the qualitative detection of total antibodies (including IgG and IgM) to SARS-CoV-2                                                      | Total antibodies against S1 RBD protein          | 10 µL                                                                                                                                                            | -PPA: 94.70%<br>-NPA: 98.89%                                                                                                                                                                                                                                                                                                                                                                      | Approved (H, M)                                                                                                                                                           |
| Assure Tech. (Hangzhou Co., Ltd)                           | Assure COVID-19 IgG/IgM Rapid Test Device                     | Human serum, plasma and venous whole blood                                                                 | Rapid lateral flow chromatographic immunoassay for the qualitative detection and differentiation of IgM and IgG antibodies to SARS-CoV-2                        | IgM and IgG antibodies against N and S1 proteins | 5 µL                                                                                                                                                             | For IgM:<br>-PPA: 86.7% in 25 positive serum samples collected 8-14 days post symptoms onset, and 100% in 3 positive whole blood samples collected 8-14 days post symptoms onset<br>-NPA: 98.1%<br>For IgG:<br>-PPA: 86.7% in 15 positive serum samples collected 8-14 days post symptoms onset, and 100% in 3 positive whole blood samples collected 8-14 days post symptoms onset<br>-NPA: 100% | - Approved (H, M)<br>- CE marked<br>- Brazilian Health Regulatory Agency authorization                                                                                    |
| <b>Enzyme Linked Immunoassays for Antibodies Detection</b> |                                                               |                                                                                                            |                                                                                                                                                                 |                                                  |                                                                                                                                                                  |                                                                                                                                                                                                                                                                                                                                                                                                   |                                                                                                                                                                           |
| EUROIMMUN US Inc.                                          | Anti-SARS-CoV-2 ELISA (IgG)                                   | Human serum or plasma (K <sup>+</sup> -EDTA, Li <sup>+</sup> -heparin, Na <sup>+</sup> -citrate) specimens | -Enzyme-Linked Immunosorbent Assays (ELISA) for the qualitative detection of S1 IgG antibodies to SARS-CoV-2                                                    | S1 IgG antibodies                                | 10 µL serum in 1.0 mL sample buffer                                                                                                                              | -PPA: 90% in RT-PCR positive samples<br>-NPA: 100 % in PCR negative samples                                                                                                                                                                                                                                                                                                                       | -Approved (H)<br>-CE marked<br>- Brazilian Health Regulatory Agency authorization<br>-Australian Therapeutic Goods Administration authorization                           |
| Roche Diagnostics                                          | Elecsys Anti-SARS-CoV-2                                       | Human serum and plasma (K2EDTA, K3EDTA, Liheparin) specimens                                               | - Electrochemiluminescence Immunoassay (ECLIA) intended for qualitative detection of antibodies to SARSCoV2<br>-Total duration of sandwich assembly: 18 minutes | Total antibodies against N protein in SARS-CoV-2 | 30 µL of sample (cobas e 411, cobas e 601, and cobas e 602 analyzers) or 18 µL of sample (cobas e 801 analyzer) are incubated with a biotinylated monoclonal IL- | -PPA: 99.81 % in 5272 RT-PCR positive samples                                                                                                                                                                                                                                                                                                                                                     | - Approved (H, M)<br>- CE Marked<br>- Australian Therapeutic Goods Administration authorization<br>- Singapore Health Sciences Authority<br>- Health Canada authorization |

## In-Vitro Diagnostics for Rapid and High-Accuracy COVID-19 Screening.

|                                     |                                                                   |                                                                       |                                                                                                                                            |                                    |                      |                                                                                                                                                                                                                   |                                                                                                                                       |
|-------------------------------------|-------------------------------------------------------------------|-----------------------------------------------------------------------|--------------------------------------------------------------------------------------------------------------------------------------------|------------------------------------|----------------------|-------------------------------------------------------------------------------------------------------------------------------------------------------------------------------------------------------------------|---------------------------------------------------------------------------------------------------------------------------------------|
|                                     |                                                                   |                                                                       |                                                                                                                                            |                                    | 6-specific antibody. |                                                                                                                                                                                                                   | - Brazilian Health Regulatory Agency authorization                                                                                    |
| Bio-Rad Laboratories, Inc.          | Platelia SARS-CoV-2 Total Ab assay                                | Human serum and plasma EDTA specimens                                 | -Enzyme-Linked Immunosorbent Assay (ELISA) intended for the qualitative detection of total antibodies (IgM, IgA and IgG) to SARS-CoV-2     | Total antibodies against N protein | 100 µL               | -PPA: 92.16% in 51 RT-PCR positive samples<br>-NPA: 99.56% in 687 RT-PCR negative samples                                                                                                                         | - Approved (H)<br>- CE marked<br>- Australian Therapeutic Goods Administration authorization<br>- Singapore Health Sciences Authority |
| Abbott Laboratories Inc.            | SARS-CoV-2 IgG assay                                              | Human serum and plasma specimens                                      | - Chemiluminescent microparticle immunoassay (CMIA) intended for the qualitative detection of IgG antibodies to SARS-CoV-2                 | IgG antibodies                     | 75 µL                | -PPA: 96.77% in samples collected ≥14 days post-symptom onset<br>-PPA: 86.36% in samples collected 8-13 days post-symptom onset<br>-NPA: 99.63%                                                                   | - Approved (H, M)<br>- CE marked                                                                                                      |
| DiaSorin Inc.                       | LIAISON SARS-CoV-2 S1/S2 IgG                                      | Human serum, and plasma specimens                                     | -Chemiluminescent immunoassay (CLIA) for qualitative detection of S1 and S2 IgG antibodies to SARS-CoV-2                                   | IgG antibodies                     | 20 µL                | -PPA: 97.65% in RT-PCR positive sampled collected at ≥15 days post-diagnosis<br>-PPA: 89.80% in RT-PCR positive sampled collected at 6-14 days post-diagnosis<br>-NPA: 99.3% (108/1090 presumed negative samples) | - Approved (H, M)<br>-CE marked<br>- Health Canada authorization<br>- Brazilian Health Regulatory Agency authorization                |
| Ortho-Clinical Diagnostics, Inc.    | VITROS Immunodiagnostic Products Anti-SARS-CoV-2 IgG Reagent Pack | Human serum specimens                                                 | -Chemiluminescent immunoassay (CLIA) test for the qualitative detection of IgG antibodies to SARS-CoV-2<br>-time to first result is 48 min | IgG antibodies against S protein   | 20 µL                | -PPA: 87.5% in 48 RT-PCR positive samples<br>-NPA: 100% in 407 presumed negative samples                                                                                                                          | - Approved (H, M)<br>- CE marked                                                                                                      |
| Mount Sinai Laboratory              | COVID-19 ELISA IgG Antibody Test                                  | Human serum and plasma specimens                                      | -Enzyme-Linked Immunosorbent Assays (ELISA) for the qualitative detection of human Sand RBD IgG antibodies to SARS-CoV-2                   | IgG antibodies against RBD protein | N.A.                 | -PPA: 92% in RT-PCR positive samples<br>-NPA: 100% in RT-PCR negative samples                                                                                                                                     | Approved (H)                                                                                                                          |
| Siemens Healthcare Diagnostics Inc. | ADVIA Centaur® SARS-CoV-2 Total (COV2T) assay                     | Human serum and plasma (potassium EDTA and lithium heparin) specimens | -Chemiluminescent immunoassay (CLIA) intended for qualitative and semi-quantitative detection of IgG antibodies to SARS-CoV-2              | IgG antibodies                     | 10 µL                | -PPA: 93.44% in 61 RT-PCR positive samples by collected at 7-13 days post-testing<br>-NPA: 99.88% in 1734 presumed negative samples                                                                               | Approved (H, M)                                                                                                                       |

|                                     |                                                          |                                                                                                                           |                                                                                                                                                                                                          |                                                                |       |                                                                                                                                                                                                |                                                                                                                                                                           |
|-------------------------------------|----------------------------------------------------------|---------------------------------------------------------------------------------------------------------------------------|----------------------------------------------------------------------------------------------------------------------------------------------------------------------------------------------------------|----------------------------------------------------------------|-------|------------------------------------------------------------------------------------------------------------------------------------------------------------------------------------------------|---------------------------------------------------------------------------------------------------------------------------------------------------------------------------|
|                                     |                                                          |                                                                                                                           |                                                                                                                                                                                                          |                                                                |       | (healthy individuals)                                                                                                                                                                          |                                                                                                                                                                           |
| Siemens Healthcare Diagnostics Inc. | Atellica® IM SARS-CoV-2 Total (COV2T) assay              | Human serum and plasma (potassium EDTA and lithium heparin) specimens                                                     | -Chemiluminescent immunoassay (CLIA) intended for qualitative detection of total antibodies (IgG and IgM) to SARS-CoV-2                                                                                  | IgG and IgM antibodies against S1 protein                      | 10 µL | -PPA: 92.19% in 64 RT-PCR positive samples by collected 7-13 post-testing<br>-NPA: 99.95% in 1841 presumed negative samples (healthy individuals)                                              | - Approved (H, M)<br>- CE Marked<br>- Australian Therapeutic Goods Administration authorization<br>- Singapore Health Sciences Authority<br>- Health Canada authorization |
| Vibrant America Clinical Labs       | Vibrant COVID-19 Ab assay                                | Human serum or Dry Blood Spot (DBS) using fingerstick blood specimen                                                      | -Chemiluminescence immunoassay (CLIA) intended for the qualitative detection and differentiation of IgM and IgG antibodies to SARS-CoV-2                                                                 | IgM and IgG against S1 subunit, RBD, S2 subunit and N proteins | N.A.  | -PPA: 98.11% in 59 presumed positive samples<br>-NPA: 98.6% in 495 presumed negative samples (healthy individuals)                                                                             | Approved (H)                                                                                                                                                              |
| Siemens Healthcare Diagnostics Inc. | Dimension® EXL™ SARS-CoV-2 Total antibody assay (CV2T)   | Human serum and plasma (dipotassium EDTA and lithium heparin) specimens                                                   | -Chemiluminescent immunoassay (CLIA) intended for the qualitative detection of total antibodies (including IgG and IgM) to SARS-CoV-2                                                                    | IgG and IgM against S1 proteins                                | 10 µL | -PPA: 77.37% in 38 RT-PCR positive samples by collected 7-13 post-testing<br>-NPA: 99.87% in 1529 presumed negative samples (healthy individuals)                                              | Approved (H, M)                                                                                                                                                           |
| Siemens Healthcare Diagnostics Inc. | Dimension Vista® SARS-CoV-2 Total antibody assay (COV2T) | Human serum and plasma (dipotassium EDTA and lithium heparin)                                                             | -Chemiluminescent immunoassay (CLIA) intended for qualitative detection of total antibodies (IgG and IgM) antibodies to SARS-CoV-2                                                                       | IgG and IgM against S1 proteins                                | 10 µL | -PPA: 97.37% in 38 RT-PCR positive samples by collected 7-14 post-testing<br>-NPA: 99.8% in 1529 presumed negative samples (healthy individuals)                                               | Approved (H, M)                                                                                                                                                           |
| InBios International, Inc.          | SCoV-2 Detect™ IgG ELISA                                 | Human serum specimens                                                                                                     | -Enzyme-Linked Immunosorbent Assays (ELISA) for the qualitative detection of IgG antibodies to SARS-CoV-2<br>-up to 90 specimens can be evaluated with each kit<br>-The entire assay takes around 1 hour | IgG antibodies                                                 | N.A.  | -PPA: 100% in RT-PCR positive samples<br>-PPA: 100% in RT-PCR positive samples collected 8-14 days post symptoms onset<br>-NPA: 98.95% in 94 presumed negative specimens (healthy individuals) | Approved (H)                                                                                                                                                              |
| Beckman Coulter, Inc.               | Access SARS-CoV-2 IgG                                    | Human serum, serum separator tubes, and plasma (lithium heparin, dipotassium EDTA, tripotassium EDTA, and sodium citrate) | -Paramagnetic particle chemiluminescent immunoassay (CLIA) intended for the qualitative detection of IgG antibodies to SARS-CoV-2                                                                        | IgG antibodies against RBD of the S1 protein                   | N.A.  | -PPA: 95.3% in presumed RT-PCR positive samples collected 4-14 days post testing<br>-NPA>99%                                                                                                   | - Approved (H, M)<br>- CE marked                                                                                                                                          |
| Babson Diagnostics, Inc.            | Babson Diagnostics aC19G1                                | Human serum and plasma (potassium EDTA,                                                                                   | - Indirect sandwich chemiluminescent immunoassay (CLIA) performed on the                                                                                                                                 | IgG antibodies                                                 | N.A.  | -PPA: 60.96% in RT-PCR positive EDTA plasma samples collected                                                                                                                                  | Approved (H)                                                                                                                                                              |

## In-Vitro Diagnostics for Rapid and High-Accuracy COVID-19 Screening.

|                                                       |                                                                                      |                                                                                                                                              |                                                                                                                                                                       |                                               |       |                                                                                                                                                                                                                                      |                                                                                                                                                |
|-------------------------------------------------------|--------------------------------------------------------------------------------------|----------------------------------------------------------------------------------------------------------------------------------------------|-----------------------------------------------------------------------------------------------------------------------------------------------------------------------|-----------------------------------------------|-------|--------------------------------------------------------------------------------------------------------------------------------------------------------------------------------------------------------------------------------------|------------------------------------------------------------------------------------------------------------------------------------------------|
|                                                       |                                                                                      | lithium heparin)                                                                                                                             | Atellica IM Analyzer intended for the qualitative detection of IgG antibodies to SARS-CoV-2                                                                           |                                               |       | 8-14 days post testing<br>-PPA: 32.57% in positive serum samples collected 8-14 days post testing<br>-NPA: 100%                                                                                                                      |                                                                                                                                                |
| Hangzhou Laihe Biotech Co., Ltd.                      | LYHER Novel Coronavirus (2019-nCoV) IgM/IgG Antibody Combo Test Kit (Colloidal Gold) | Serum and plasma (dipotassium-EDTA, lithium-heparin, or sodium-citrate)                                                                      | -Lateral flow immunoassay intended for the qualitative detection of and differentiation of IgG and IgM antibodies to SARS-CoV-2<br>- time-to-results is 10-15 minutes | IgG and IgM antibodies against S protein      | 50 µL | For IgM:<br>-PPA: 85.71% from 21 RT-PCR positive samples collected 7-14 days post symptoms onset<br>-NPA: 99.43%<br>For IgG:<br>-PPA: 76.19% from 21 RT-PCR positive samples collected 7-14 days post symptoms onset<br>-NPA: 99.43% | -Approved (H, M)<br>-CE marked<br>- Brazilian Health Regulatory Agency authorization<br>- Australian Therapeutics Administration authorization |
| Biohit Healthcare (Hefei) Co. Ltd.                    | Biohit SARS-CoV-2 IgM/IgG Antibody Test Kit                                          | Human serum, plasma (heparin, dipotassium EDTA, and sodium citrate), and venous whole blood (heparin, dipotassium EDTA, and sodium citrate). | -Rapid immunochromatographic test for the qualitative detection and differentiation of IgM and IgG antibodies to SARS-CoV-2<br>- time-to-results is 15 minutes        | IgG and IgM antibodies against N protein      | 10 µL | For IgM:<br>-PPA: 83.02% in presumed positive samples 4-14 days post symptoms onset<br>-NPA: 99.46%<br>For IgG:<br>-PPA: 56.6% in RT-PCR positive samples collected 4-14 days post symptoms onset<br>-NPA: 100%                      | - Approved (H, M)<br>- CE marked                                                                                                               |
| Emory Medical Laboratories                            | SARS-CoV-2 RBD IgG test                                                              | Human serum                                                                                                                                  | Enzyme-Linked Immunosorbent Assay (ELISA) intended for the qualitative detection of IgG antibodies to SARS-CoV-2                                                      | IgG antibodies against RBD fusion protein     | N.A.  | - PPA: 100% in 38 presumed positive samples collected 8-14 days post testing<br>-NPA: 97.68%                                                                                                                                         | Approved (H)                                                                                                                                   |
| Wadsworth Center, New York State Department of Health | New York SARS-CoV Microsphere Immunoassay for Antibody Detection                     | Human serum specimens                                                                                                                        | Microsphere Immunoassay (MIA) intended for qualitative detection of total antibodies (IgG, IgM and IgA) to SARSCoV2                                                   | Total antibody against N protein              | N.A.  | -PPA: 79.3% in 334 PCR positive samples collected 20 days post symptom onset<br>-NPA: >96% in samples collected from different set of sera                                                                                           | Approved (H)                                                                                                                                   |
| Siemens Healthcare Diagnostics Inc.                   | ADVIA Centaur SARS-CoV-2 IgG (COV2G)                                                 | Human serum and plasma                                                                                                                       | Chemiluminescent immunoassay for qualitative and semi-quantitative detection of IgG antibodies to SARS-CoV-2                                                          | IgG antibodies                                | 10 µL | -PPA: 100% in RT-PCR positive samples collected >14 days posttesting<br>-NPA: 99.89%                                                                                                                                                 | Approved (H, M)                                                                                                                                |
| Luminex Corporation                                   | xMAP SARS-CoV-2 Multi-Antigen IgG Assay                                              | Human serum and plasma                                                                                                                       | Multiplex, microsphere-based assay for qualitative detection of IgG antibodies to SARS-CoV-2                                                                          | IgG antibodies against N, RBD and S1 proteins | 10 µL | -PPA: 100%<br>-NPA: 99.2%                                                                                                                                                                                                            | Approved (H)                                                                                                                                   |
| Diazyme Laboratories, Inc.                            | Diazyme DZ-Lite SARS-CoV-2 IgG CLIA Kit                                              | Human serum and plasma                                                                                                                       | Chemiluminescent immunoassay for the qualitative detection of IgG antibodies to SARS-CoV-2                                                                            | IgG antibodies                                | 10 µL | -PPA: 100% in RT-PCR positive samples collected >15 days post testing<br>-NPA: 97.4%                                                                                                                                                 | Approved (H, M)                                                                                                                                |

|                                                      |                                                     |                                    |                                                                                                                                                               |                   |                                              |                                                                                                           |                                                                                                                                                  |
|------------------------------------------------------|-----------------------------------------------------|------------------------------------|---------------------------------------------------------------------------------------------------------------------------------------------------------------|-------------------|----------------------------------------------|-----------------------------------------------------------------------------------------------------------|--------------------------------------------------------------------------------------------------------------------------------------------------|
| InBios International, Inc.                           | S-CoV-2 Detect IgM ELISA                            | Human serum                        | Enzyme-Linked Immunosorbent Assay (ELISA) for the qualitative detection of IgM antibodies to SARS-CoV-2                                                       | IgM antibodies    | 4 µL                                         | -PPA: 92.50%<br>-NPA: 98.95%                                                                              | Approved (H)                                                                                                                                     |
| <b>Antigen-based Assays for SARS-CoV-2 Detection</b> |                                                     |                                    |                                                                                                                                                               |                   |                                              |                                                                                                           |                                                                                                                                                  |
| Quidel Corporation                                   | Sofia 2 SARS Antigen FIA                            | Direct NP and nasal swab specimens | - Lateral flow immunofluorescent sandwich assay for the qualitative detection of the N protein antigen in SARS-CoV-2<br>- time-to-results is 15 minutes       | N protein antigen | 1.13x10 <sup>2</sup> TCID <sub>50</sub> /mL  | - PPA: 80% in 59 RT-PCR positive frozen NP samples<br>- NPA: 100% in 84 RT-PCR negative frozen NP samples | -Approved (H, M)<br>-Authorized for distribution and use in patient care settings under a CLIA Certificate of Waiver (Certificate of Compliance) |
| Becton, Dickinson and Company (BD)                   | BD Veritor System for Rapid Detection of SARS-CoV-2 | Direct nasal swab specimens        | -Chromatographic digital immunoassay intended for the direct and qualitative detection the N protein antigen in SARS-CoV-2<br>- time-to-results is 15 minutes | N protein antigen | 1.4 x 10 <sup>2</sup> TCID <sub>50</sub> /mL | -PPA: 84% in RT-PCR positive samples<br>-NPA: 100% in RT-PCR negative samples                             | -Approved (H, M)<br>-Authorized for distribution and use in patient care settings under a CLIA Certificate of Waiver (Certificate of Compliance) |
| LumiraDx UK Ltd.                                     | LumiraDx SARS-CoV-2 Ag Test                         | Direct nasal swab specimens        | -Rapid microfluidic immunofluorescence assay for qualitative detection of the N protein antigen in SARS-CoV-2<br>- time-to-results is 12 minutes              | N protein antigen | 2.8 x 10 <sup>5</sup> TCID <sub>50</sub> /m  | -PPA is 97.6%<br>-NPA is 96.6%                                                                            | -Approved (H, M)<br>-Authorized for distribution and use in patient care settings under a CLIA Certificate of Waiver (Certificate of Compliance) |
| Abbott Diagnostics Scarborough, Inc.                 | BinaxNOW COVID-19 Ag Card                           | Direct nasal swab specimens        | - Lateral flow immunofluorescent sandwich assay for the qualitative detection of the N protein antigen in SARS-CoV-2<br>- time-to-results is 15 minutes       | N protein antigen | 22.5 TCID <sub>50</sub> /swab                | -PPA is 97.1% in presumed positive samples<br>-NPA is 98.5% in presumed negative samples                  | -Approved (H, M)<br>-Authorized for distribution and use in patient care settings under a CLIA Certificate of Waiver (Certificate of Compliance) |
